# Supplementary material for: p66Shc Signaling Mediates Diabetes-Related Cognitive Decline
Source: PubMed Central journal article supplement (PMC5816624; doi:10.1038/s41598-018-21426-6), 2018-02-16
Supplement: 41598_2018_21426_MOESM1_ESM.pdf [file 41598_2018_21426_MOESM1_ESM.pdf]

## **Supplementary Information**

### **p66Shc Signaling Mediates Diabetes-Related Cognitive Decline**

**Yohei Minami<sup>1</sup>, Noriyuki Sonoda<sup>1,2,6</sup>, Eiichi Hayashida<sup>1</sup>, Hiroaki Makimura<sup>1</sup>,  
Makoto Ide<sup>1</sup>, Noriko Ikeda<sup>1</sup>, Masahiro Ohgidani<sup>3</sup>, Takahiro A. Kato<sup>2,3</sup>, Yoshihiro  
Seki<sup>3</sup>, Yasutaka Maeda<sup>1,2</sup>, Shigenobu Kanba<sup>3</sup>, Ryoichi Takayanagi<sup>1</sup>, Yoshihiro  
Ogawa<sup>1,4,5</sup>, Toyoshi Inoguchi<sup>1,2</sup>**

<sup>1</sup>Department of Internal Medicine and Bioregulatory Science, Graduate School of Medical Sciences, Kyushu University, Fukuoka, Japan, <sup>2</sup>Innovation Center for Medical Redox Navigation, Kyushu University, Fukuoka, Japan, <sup>3</sup>Department of Neuropsychiatry, Graduate School of Medical Sciences, Kyushu University, Fukuoka, Japan, <sup>4</sup>Department of Molecular Endocrinology and Metabolism, Graduate School of Medical and Dental Sciences, Tokyo Medical and Dental University, Tokyo, Japan, <sup>5</sup>CREST, Japan Agency for Medical Research and Development, Tokyo, Japan <sup>6</sup>Lead Contact.

Correspondence and reprint requests should be addressed to Noriyuki Sonoda. (E. mail: noriyuki@intmed3.med.kyushu-u.ac.jp)

**Table S1: Nucleotide Sequences of Primers. Related to Figure 3, 5**

| Gene                            | Forward primer (5'→3') | Reverse primer (5'→3')  |
|---------------------------------|------------------------|-------------------------|
| <i>gp91phox</i>                 | ACTGCGGAGAGTTTGGGAAGA  | GGTGATGACCACCTTTTGCT    |
| <i>p22phox</i>                  | TGGCTACTGCTGGACGTTTCAC | CTCCAGCAGACAGATGAGCACAC |
| <i>IL-1<math>\beta</math></i>   | AAATACCTGTGGCCTTGGGC   | CTTGGGATCCACACTCTCCAG   |
| <i>TNF-<math>\alpha</math></i>  | CTCCTGGCCAACGGCATGGAT  | ATCGGCTGACGGTGTGGGTG    |
| <i>p66Shc</i>                   | CCCCAAGCCGAAGTACAACCCA | TCCGGGGAAAGAAGGAACACAGG |
| <i><math>\beta</math>-Actin</i> | TGACAGGATGCAGAAGGAGA   | GCTGGAAGGTGGACAGTGAG    |

**Table S2: Body Weight and Blood Glucose in Type 1 and Type 2 diabetic mice. Related to Figure 1 to 3.**

|                               | age (weeks)          | body weight (g) | Blood glucose (mg/dL) |
|-------------------------------|----------------------|-----------------|-----------------------|
| Type 1 diabetic mice (ICR)    |                      |                 |                       |
| diabetic (STZ-induced), n = 9 | 7weeks aged          | 33.6±0.3        | 133.0±5.6             |
| control (vehicle), n = 9      | (before STZ)         | 33.8±0.5        | 137.8±8.3             |
| diabetic (STZ-induced), n = 9 | 21weeks aged         | 41.4±1.3*       | 681.2±27.9*           |
| control (vehicle), n = 9      | (14 weeks after STZ) | 48.0±0.6        | 164.3±3.8             |
| Type 2 diabetic mice (db/db)  |                      |                 |                       |
| diabetic (db/db), n = 10      | 10 weeks aged        | 44.9±0.5*       | 543.9±14.7*           |
| control (db/+), n = 6         |                      | 27.6±0.2        | 128.7±13.6            |
| diabetic (db/db), n = 10      | 30weeks aged         | 57.0±2.4*       | 487.4±128.0*          |
| control (db/+), n = 6         |                      | 32.3±0.3        | 116.5±8.8             |

Body weight and blood glucose concentrations in type 1 and type 2 diabetic mice. Data are means  $\pm$  SE. \*P < 0.05 vs. control.

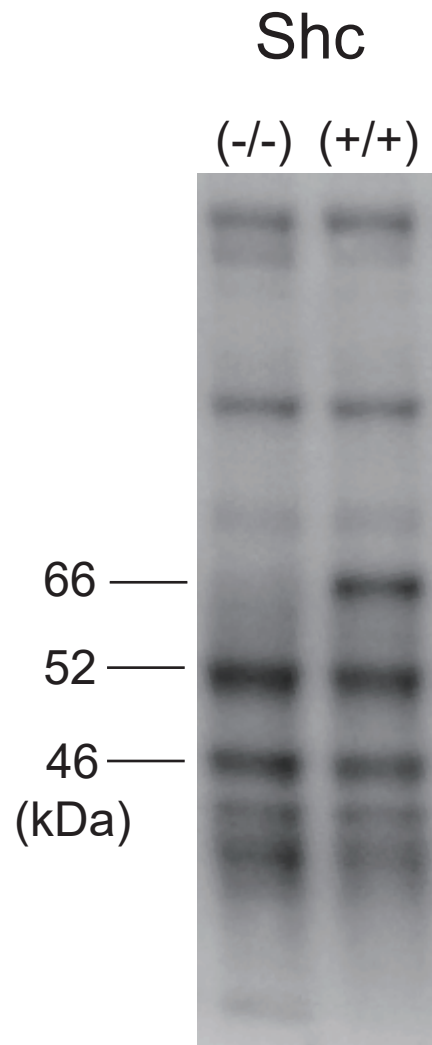

**Figure S1: Western blot analysis to confirm deleted protein expression of p66Shc.**

**Related to Figure 4.**

Western blotting results using anti-Shc protein antibody, with total protein extracted from liver homogenates of *p66Shc* (-/-) and *p66shc* (+/+) mice.

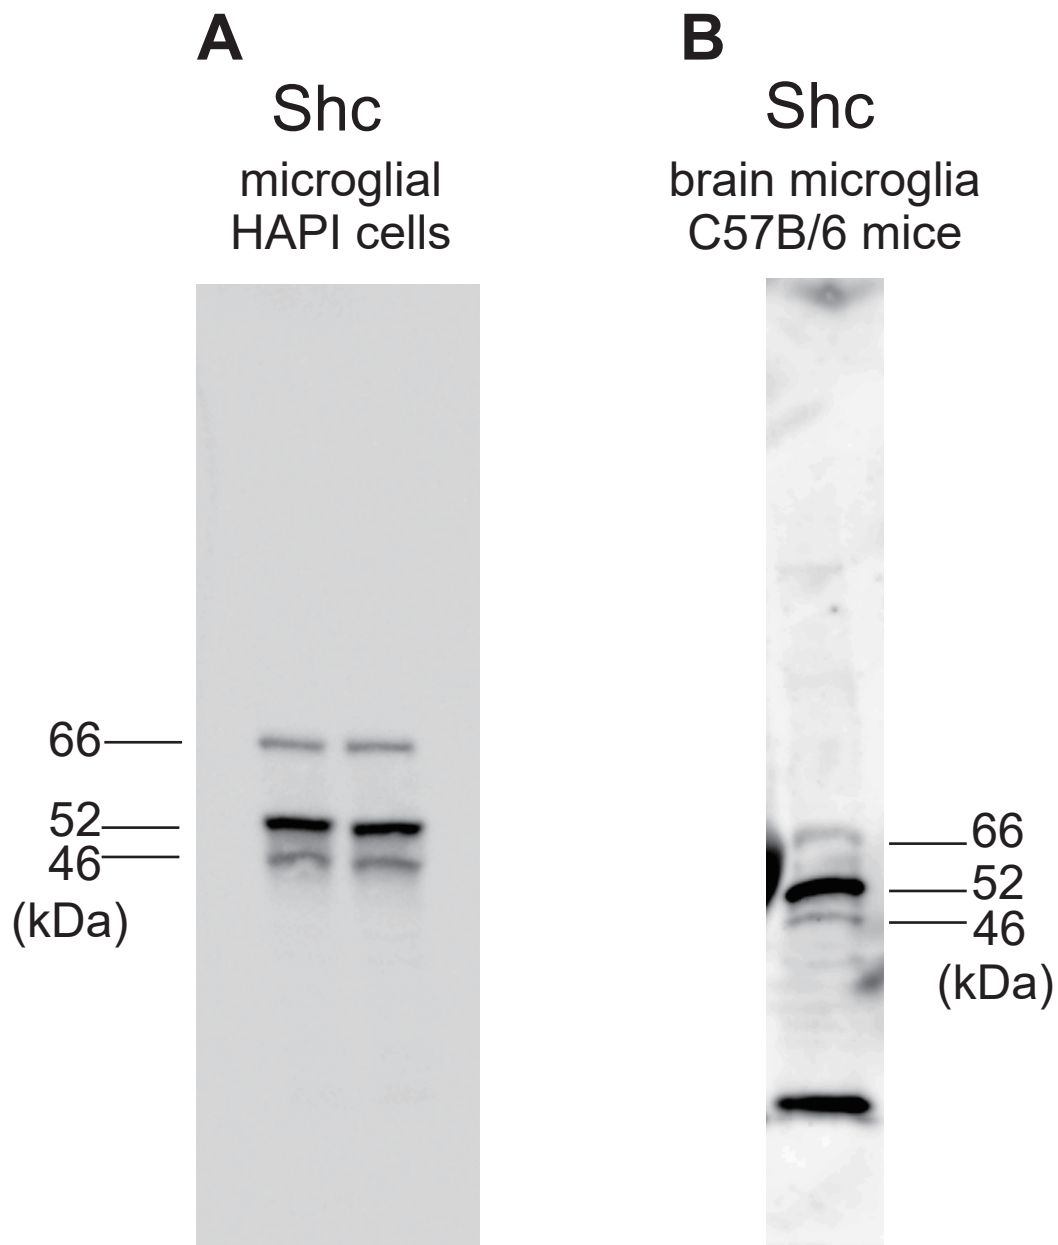

**Figure S2: Western blot analysis of microglial cells.**

**Related to Figure 6.**

Western blotting results using anti-Shc protein antibody, (A) with total protein extracted from microglial HAPI (highly aggressively proliferating immortalized) cells, and (B) with total protein extracted from brain microglia of C57B/6 mice.
